# Supplementary material
Source: PubMed Central journal article supplement (PMC9248963)
Supplement: YPGH_A_2029301_SM0668.pdf [file YPGH_A_2029301_SM0668.pdf]

Supplementary Doc 1 - Search strategy

**Pubmed, Scopus and Web of Science Clarivate (Advanced search)** (adapted per database)

#1. ( immune OR immuned OR immunes OR immunisation OR vaccination OR vaccination OR immunization OR immunization OR immunisations OR immunizations OR immunise OR immunised OR immuniser OR immunisers OR immunising OR immunities OR immunity OR immunity OR immunizations OR immunize OR immunized OR immunizer OR immunizers OR immunizes OR immunizing OR antibodies OR antibodies OR antibodies OR antibody OR antibody OR immunoglobulins OR immunoglobulins OR antibody OR IgG OR IgM OR "immunoglobulin G" OR "immunoglobulin M" OR "immunoglobulin A" OR IgA OR T cells OR B cells OR "immune memory" OR "immunological memory" OR "memory cells" OR CD4 OR CD8 OR "memory B cells" OR "memory T cells" OR "humoral immunity" OR "cellular immunity" OR "adaptive immunity" OR "memory CD4 T cells" OR "memory CD8 T cells" OR "memory CD4+ T cells" OR "memory CD8+ T cells" OR "memory CD4+ T cells" OR "memory CD8+ T cells" OR reinfect\* OR repositive)

#2. (COVID OR COVID19 OR "SARS-CoV-2" OR "SARS-CoV2" OR SARSCoV2 OR "SARSCoV-2" OR "SARS coronavirus 2" OR "2019 nCoV" OR "2019nCoV" OR "2019-novel CoV" OR "nCov 2019" OR "nCov 19" OR "severe acute respiratory syndrome coronavirus 2" OR "novel coronavirus disease" OR "novel corona virus disease" OR "corona virus disease 2019" OR "coronavirus disease 2019" OR "novel coronavirus pneumonia" OR "novel corona virus pneumonia" OR "severe acute respiratory syndrome coronavirus 2") OR AB=(COVID OR COVID19 OR "SARS-CoV-2" OR "SARS-CoV2" OR SARSCoV2 OR "SARSCoV-2" OR "SARS coronavirus 2" OR "2019 nCoV" OR "2019nCoV" OR "2019-novel CoV" OR "nCov 2019" OR "nCov 19" OR "severe acute respiratory syndrome coronavirus 2" OR "novel coronavirus disease" OR "novel corona virus disease" OR "corona virus disease 2019" OR

"coronavirus disease 2019" OR "novel coronavirus pneumonia" OR "novel corona virus pneumonia" OR "severe acute respiratory syndrome coronavirus 2")

#3. #1 AND #2

Filters

Time=2020-2021

### **medRxiv and bioRxiv (Advanced search)**

for abstract or title "immune\*" (match all words)

for abstract or title "reinfect\*" (match all words)

for abstract or title "repositive" (match all words)
